# Supplementary material for: Eicosapentaenoic Acid Improves Endothelial Nitric Oxide Bioavailability Via Changes in Protein Expression During Inflammation
Source: PubMed Central journal article supplement (PMC11292741; doi:10.1161/jaha.123.034076), 2024-07-03
Supplement: JAH3-13-e034076-s001.pdf [file JAH3-13-e034076-s001.pdf]

# **SUPPLEMENTAL MATERIAL**

**Table S1**

| Protein | EPA 10 $\mu$ M<br>(IL-6 vs EPA + IL-6) |                       | EPA 40 $\mu$ M<br>(IL-6 vs EPA + IL-6) |                       |
|---------|----------------------------------------|-----------------------|----------------------------------------|-----------------------|
|         | Log2 Fold Change                       | <i>p</i> -value       | Log2 Fold Change                       | <i>p</i> -value       |
| DDAH1   | -0.131                                 | 0.046                 | -0.0937                                | 0.035                 |
| HMGB1   | -0.126                                 | 0.025                 | -0.17                                  | 0.0002                |
| HMOX1   | -0.269                                 | 0.002                 | -1.04                                  | $2.12 \times 10^{-9}$ |
| ITGAV   | 0.451                                  | 0.0006                | 0.0858                                 | 0.010                 |
| ITGB1   | 0.346                                  | $9.57 \times 10^{-5}$ | 0.169                                  | 0.0004                |
| NQO1    | -0.452                                 | $1.66 \times 10^{-6}$ | -0.377                                 | $2.29 \times 10^{-6}$ |
| PARK7   | -0.255                                 | 0.001                 | -0.12                                  | 0.003                 |
| PRDX2   | -0.239                                 | 0.002                 | -0.071                                 | 0.044                 |
| SNCA    | -0.311                                 | 0.009                 | -0.204                                 | $1.99 \times 10^{-5}$ |
| TXN     | -0.539                                 | 0.006                 | -0.238                                 | $1.35 \times 10^{-5}$ |

**Summary of Log2 Fold Change and P-Values of Anti-Inflammatory and Antioxidant Response Proteins Modulated by EPA relative to IL-6 at 10 and 40  $\mu$ M.** the sign of the fold change value indicates direction of change. Key: DDAH1, dimethylarginine dimethylaminohydrolase-1; HMGB1, high mobility group box protein 1; HMOX1, heme oxygenase-1; ITGAV, integrin  $\alpha$ V; ITGB1, integrin B1; NQO1, NAD(P)H quinone oxidoreductase-1; PARK1, Parkinson disease protein 7; PRDX2, peroxiredoxin-2; SNCA;  $\alpha$ -synuclein; TXN, thioredoxin.







**Table S3**

| Fatty Acid                                          |                        | Treatment                 |                        |                              |
|-----------------------------------------------------|------------------------|---------------------------|------------------------|------------------------------|
|                                                     |                        | Control<br>(mg/g protein) | IL-6<br>(mg/g protein) | EPA + IL-6<br>(mg/g protein) |
| 14:0                                                | Myristic               | 7.63 ± 0.37               | 7.68 ± 0.38            | 8.65 ± 0.14                  |
| 16:0                                                | Palmitic               | 60.09 ± 2.86              | 59.62 ± 3.30           | 66.02 ± 0.72                 |
| <i>trans</i> -16:1n7                                | Palmitelaidic          | 1.13 ± 0.06               | 1.07 ± 0.13            | 1.00 ± 0.03                  |
| <i>cis</i> -16:1n7                                  | Palmitoleic            | 6.33 ± 0.54               | 6.61 ± 0.21            | 6.71 ± 0.17                  |
| 18:0                                                | Stearic                | 40.80 ± 2.42              | 39.98 ± 2.43           | 43.87 ± 0.44                 |
| <i>trans</i> -18:1n9                                | Elaidic                | 0.95 ± 0.12               | 1.10 ± 0.13            | 0.93 ± 0.08                  |
| <i>cis</i> -18:1n9                                  | Oleic                  | 84.28 ± 4.76              | 82.53 ± 4.13           | 78.91 ± 2.23                 |
| <i>trans</i> -18:2n6                                | Linoelaidic            | 2.36 ± 0.08               | 2.47 ± 0.10            | 2.55 ± 0.07                  |
| <i>cis</i> -18:2n6                                  | Linoleic               | 4.39 ± 0.32               | 4.69 ± 0.08            | 5.05 ± 0.08                  |
| 18:3n3                                              | α-Linolenic            | 0.03 ± 0.01               | 0.11 ± 0.04            | 0.07 ± 0.02                  |
| 18:3n6                                              | γ-Linolenic            | 0.11 ± 0.02               | 0.20 ± 0.05            | 0.35 ± 0.002* ‡              |
| 20:0                                                | Arachidic              | 0.93 ± 0.04               | 1.09 ± 0.08            | 1.00 ± 0.04                  |
| 20:1n9                                              | Eicosenoic             | 1.54 ± 0.11               | 1.41 ± 0.19            | 0.91 ± 0.03*                 |
| 20:2n6                                              | Eicosadienoic          | 0.39 ± 0.04               | 0.36 ± 0.01            | 0.51 ± 0.05                  |
| 20:3n6                                              | Dihomo-γ-linolenic     | 4.77 ± 0.46               | 4.90 ± 0.10            | 5.29 ± 0.20                  |
| 20:4n6                                              | Arachidonic (AA)       | 17.61 ± 2.13              | 17.85 ± 0.41           | 17.23 ± 0.86                 |
| 20:5n3                                              | Eicosapentaenoic (EPA) | 1.24 ± 0.14               | 1.28 ± 0.05            | 26.71 ± 1.28* ‡              |
| 22:0                                                | Behenic                | 1.14 ± 0.05               | 1.14 ± 0.11            | 1.19 ± 0.17                  |
| 22:4n6                                              | Docosatetraenoic       | 2.93 ± 0.28               | 3.11 ± 0.20            | 3.54 ± 0.14                  |
| 22:5n6                                              | Docosapentaenoic ω6    | 0.59 ± 0.06               | 0.64 ± 0.04            | 0.52 ± 0.04                  |
| 22:5n3                                              | Docosapentaenoic ω3    | 5.86 ± 0.69               | 6.17 ± 0.36            | 29.42 ± 1.91* ‡              |
| 22:6n3                                              | Docosahexaenoic        | 7.05 ± 0.86               | 7.41 ± 0.43            | 8.03 ± 0.52                  |
| 24:0                                                | Lignoceric             | 1.94 ± 0.08               | 2.13 ± 0.03            | 2.10 ± 0.08                  |
| 24:1n9                                              | Nervonic               | 1.28 ± 0.03               | 1.28 ± 0.20            | 1.16 ± 0.07                  |
| Eicosapentaenoic/Arachidonic Acid<br>Ratio (EPA/AA) |                        | 0.07 ± 0.01               | 0.07 ± 0.003           | 1.55 ± 0.11* ‡               |

**Summary of Fatty Acid Levels in HUVECs Following Treatment with IL-6 ± EPA.** Results shown as mean ± SEM. Statistical analysis were carried out by one-way ANOVA followed by *post hoc* Tukey-Kramer multiple comparisons test between groups. \**p*<0.05 vs control; ‡*p*<0.05 vs IL-6.

**Figure S1**

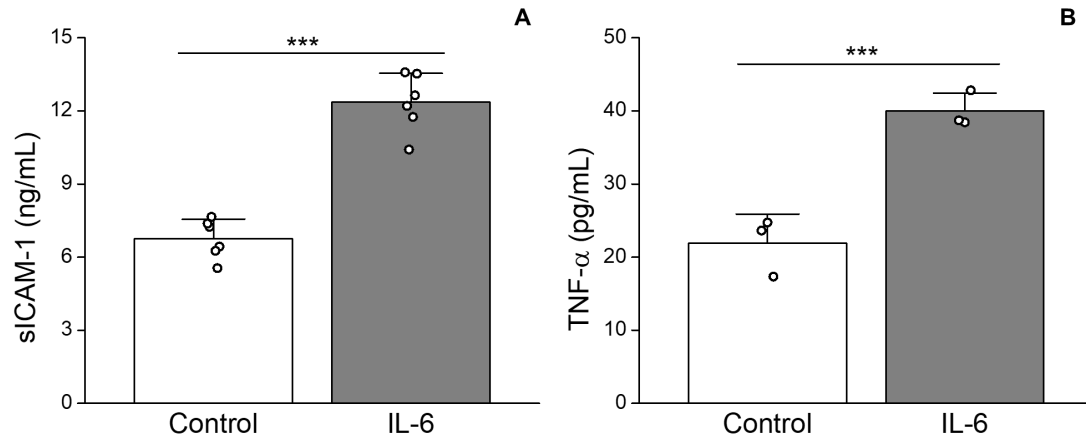

**Release of (A) sICAM-1 and (B) TNF- $\alpha$  from HUVECs Challenged with IL-6.** sICAM statistical indicators: \*\*\* $p < 0.0001$  versus control (Unpaired, two-tailed Student's T-test,  $t = 9.529$ ,  $df = 10$ ). TNF- $\alpha$  statistical indicators: \*\*\* $p = 0.0026$  versus control (Unpaired, two-tailed Student's t-test,  $t = 6.682$ ,  $df = 4$ ). Values are mean  $\pm$  SD (N = 3-6).

Figure S2

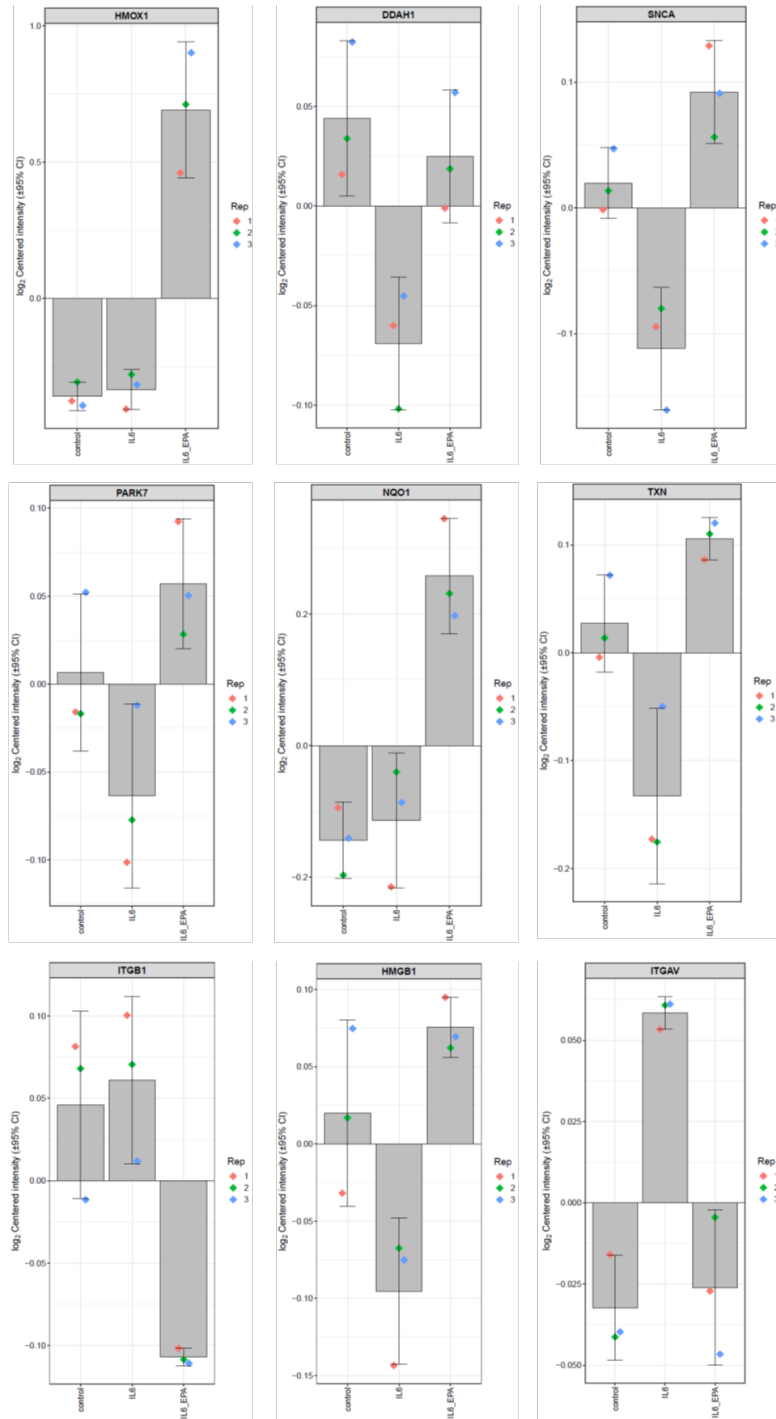

**Summary of Anti-inflammatory and Antioxidant Response Proteins Modulated by EPA at 40  $\mu$ M in IL-6-Challenged ECs.** Key: DDAH1, dimethylarginine dimethylaminohydrolase-1; HMGB1, high mobility group box protein 1; HMOX1, heme oxygenase-1; ITGAV, integrin  $\alpha$ V; ITGB1, integrin B1; NQO1, NAD(P)H quinone oxidoreductase-1; PARK1, Parkinson disease protein 7; SNCA;  $\alpha$ -synuclein; TXN, thioredoxin.



**Figure S3**

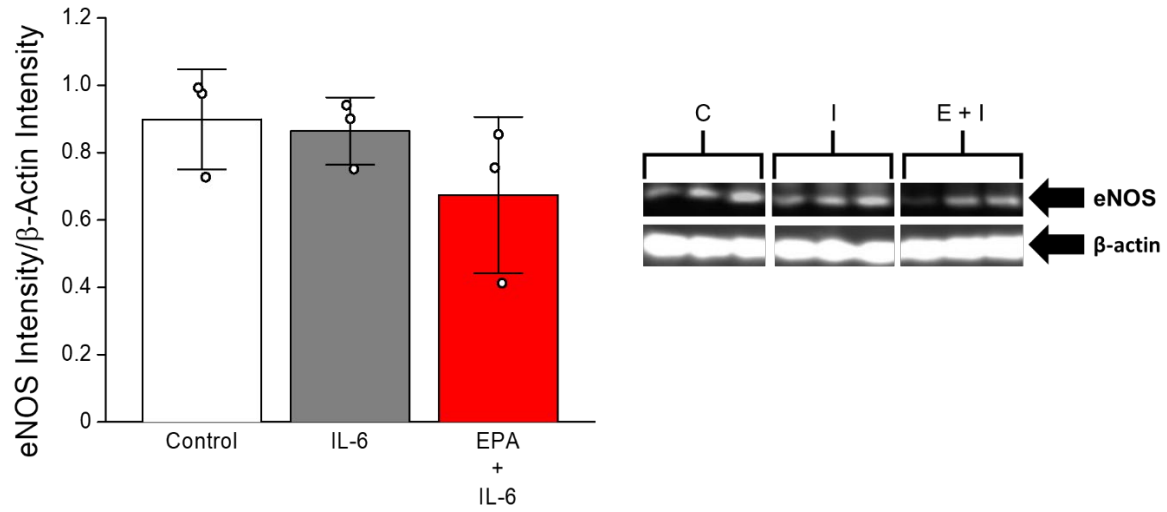

**Expression of eNOS Across Treatment Groups.** The expression of eNOS was normalized to  $\beta$ -actin levels. (Tukey-Kramer Multiple Comparisons Test; overall ANOVA:  $p=0.2897$ ,  $F = 1.534$ ). Values are mean  $\pm$  SD ( $N = 3$ ). Abbreviations: C, control; I, IL-6; E + I, EPA + IL-6.

**Figure S4**

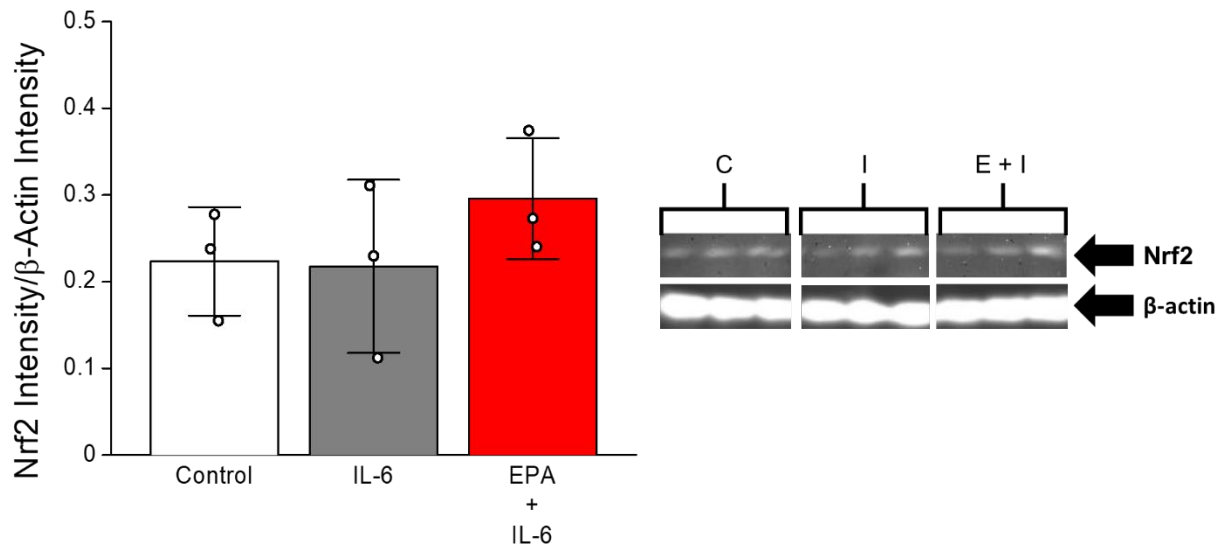

**Expression of Nrf2 Across Treatment Groups.** The expression of Nrf2 was normalized to β-actin levels. (Tukey-Kramer Multiple Comparisons Test; overall ANOVA:  $p=0.4506$ ,  $F = 0.9132$ ). Values are mean  $\pm$  SD ( $N = 3$ ). Abbreviations: C, control; I, IL-6; E + I, EPA + IL-6.
